# Supplementary material for: Cell-type specific differences in promoter activity of the ALS-linked C9orf72 mouse ortholog
Source: Sci Rep. 2017 Jul 18;7:5685. doi: 10.1038/s41598-017-05864-2 (PMC5515847; doi:10.1038/s41598-017-05864-2)
Supplement: Supplementary file 1 — Supplementary information [file 41598_2017_5864_MOESM1_ESM.pdf]

# Supplementary Information

## **Cell-type specific differences in promoter activity of the ALS-linked *C9orf72* mouse ortholog**

Abraham J. Langseth<sup>1,‡</sup>, Juhyun Kim<sup>1,‡</sup>, Janet E. Ugolino<sup>1,2</sup>, Yajas Shah<sup>1,2</sup>, Ho-Yon Hwang<sup>1,2</sup>,  
Jiou Wang<sup>1,2,\*</sup>, Dwight E. Bergles<sup>1,\*</sup>, Solange P. Brown<sup>1,\*</sup>

### **Affiliations:**

<sup>1</sup>Solomon H. Snyder Department of Neuroscience, Johns Hopkins University School of  
Medicine, Baltimore, Maryland, 21205.

<sup>2</sup>Department of Biochemistry and Molecular Biology, Bloomberg School of Public Health, Johns  
Hopkins University, Baltimore, Maryland 21205

<sup>‡</sup>These authors contributed equally.

\*Corresponding authors: Solange P. Brown ([spbrown@jhmi.edu](mailto:spbrown@jhmi.edu)), Dwight E. Bergles  
([dbergles@jhmi.edu](mailto:dbergles@jhmi.edu)), Jiou Wang ([jiouw@jhmi.edu](mailto:jiouw@jhmi.edu)).

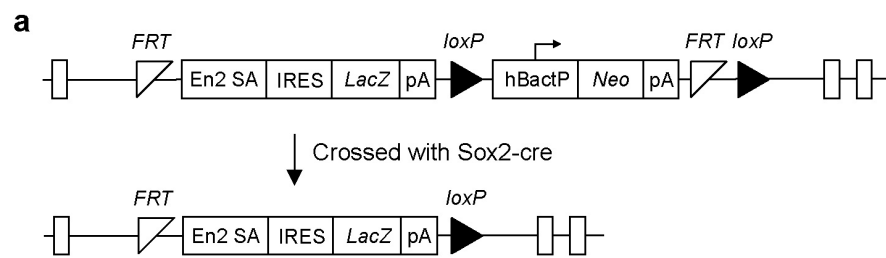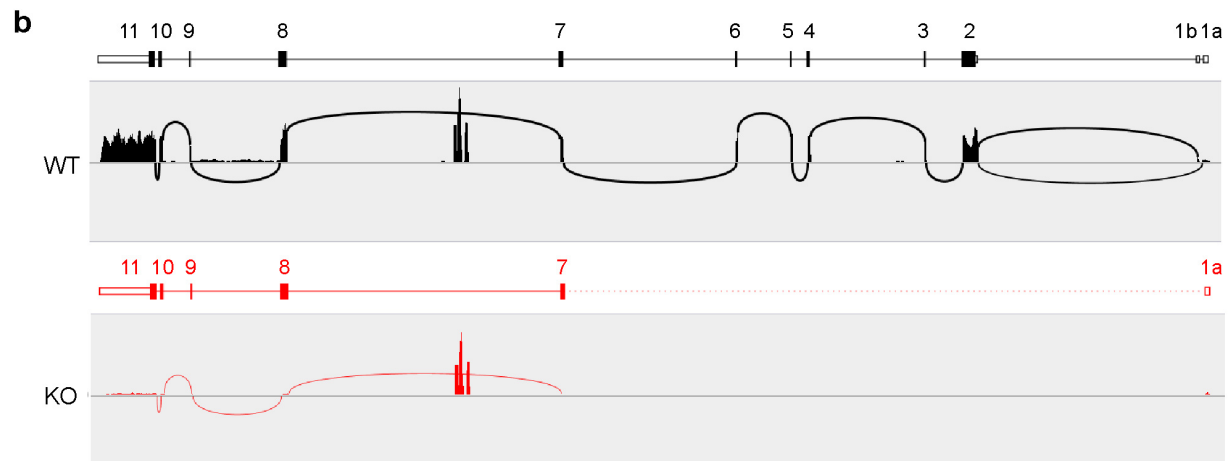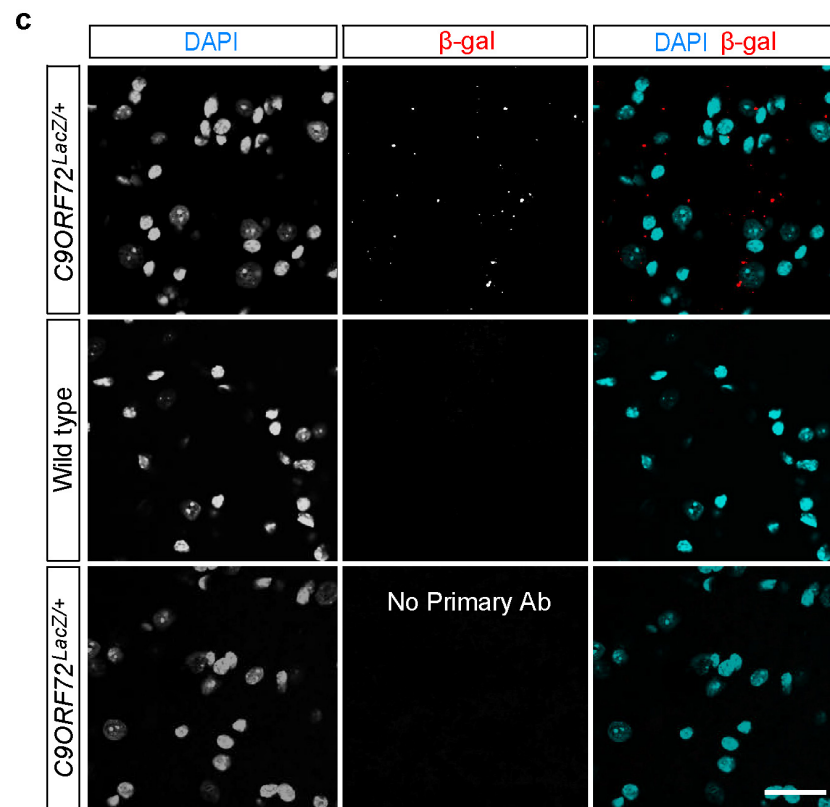

**Supplementary Figure 1. Genetic scheme of *Neo*-deleted *C9orf72*<sup>LacZ/+</sup> mouse lines and validation of antibodies used to detect  $\beta$ -galactosidase-positive puncta in *C9orf72*<sup>LacZ/+</sup> mice.**

**(a)** *C9orf72*<sup>LacZ/+</sup> mice were generated from ES cells obtained from the National Institutes of Health Knockout Mouse Project (311004O21Rik) on a C57BL/6 background. The *Neo* cassette was removed by breeding founders to Sox2-Cre mice on a C57BL/6 background and the Sox2-Cre transgene was subsequently eliminated with further breeding. For further details, see<sup>29</sup>. **(b)** Sashimi plot of RNA-seq analysis of spinal cord samples from wild-type and knockout mice at the 3110043O21Rik locus<sup>28</sup>. In the wild-type mice, the RNA alignment data along with splice junction tracks are shown, supporting a transcript model of 11 exons with two alternative starts. In the homozygous knockout mice, exons 2-6 are absent from the transcript, in accordance with the targeted allele. The transcript level appears to be lower in the knockout mice than in the wild-type control, and all detected transcripts start from exon 1a. **(c)**

Representative images of a spinal cord section from a *C9orf72*<sup>LacZ/+</sup> mouse (*top*) immunostained for  $\beta$ -galactosidase ( $\beta$ -gal; red) and DAPI (blue) showing  $\beta$ -gal-positive puncta. Representative images from a wildtype mouse (*middle*) immunostained for  $\beta$ -gal (red) and DAPI (blue) showing no background staining. Representative images from a *C9orf72*<sup>LacZ/+</sup> mouse (*top*) immunostained by omitting the primary antibody for  $\beta$ -gal (red) and DAPI (blue). No  $\beta$ -gal-positive puncta were detected in the wild type mice or in experiments in which the primary antibody was omitted. Scale bar, 30  $\mu$ m.

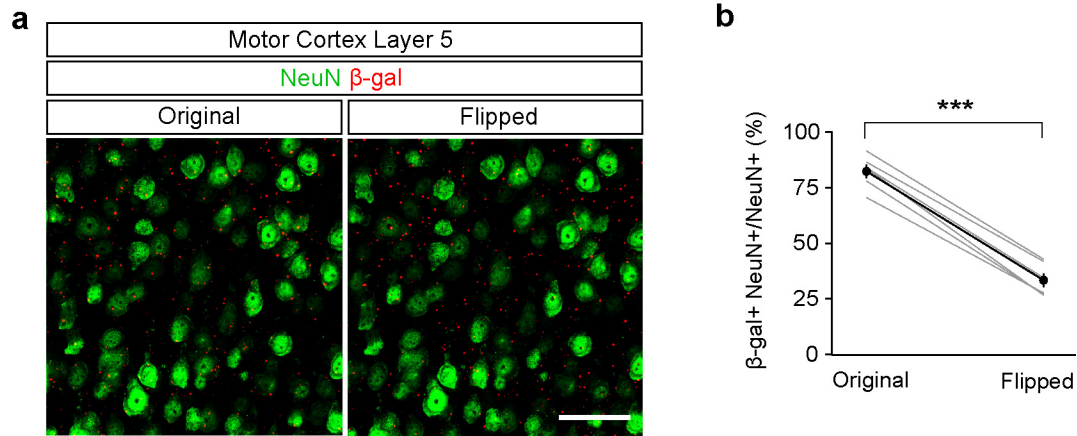

**Supplementary Figure 2. The localization of the  $\beta$ -galactosidase-positive puncta is specific to cortical neurons.** Representative images of layer 5 of motor cortex from *C9orf72*<sup>LacZ/+</sup> mice immunostained for NeuN and  $\beta$ -galactosidase ( $\beta$ -gal) before (**a**; left) and after (**a**; right) the  $\beta$ -gal channel was flipped around the vertical axis relative to the NeuN channel. Scale bar, 50  $\mu$ m. (**b**) Quantification of the colocalization of  $\beta$ -gal-positive puncta in NeuN-positive neurons in the original and flipped configurations (Original: 82.4  $\pm$  3.0%; Flipped: 33.5  $\pm$  3.1%,  $n$  = 6 images,  $p$  < 0.0001, paired t-test).
